# Supplementary material for: US National Trends in Pediatric Deaths From Prescription and Illicit Opioids, 1999-2016
Source: PubMed Central journal article supplement (PMC6324338; doi:10.1001/jamanetworkopen.2018.6558), 2018-12-28

## Supplementary Online Content

Gaither JR, Shabanova V, Leventhal JM. US national trends in pediatric deaths from prescription and illicit opioids, 1999-2016. *JAMA Netw Open*. 2018;1(8):e186558.  
doi:10.1001/jamanetworkopen.2018.6558

### **eFigure.** Age-Stratified Pediatric Death Counts

This supplementary material has been provided by the authors to give readers additional information about their work.

**eFigure. Age-Stratified Pediatric Death Counts**

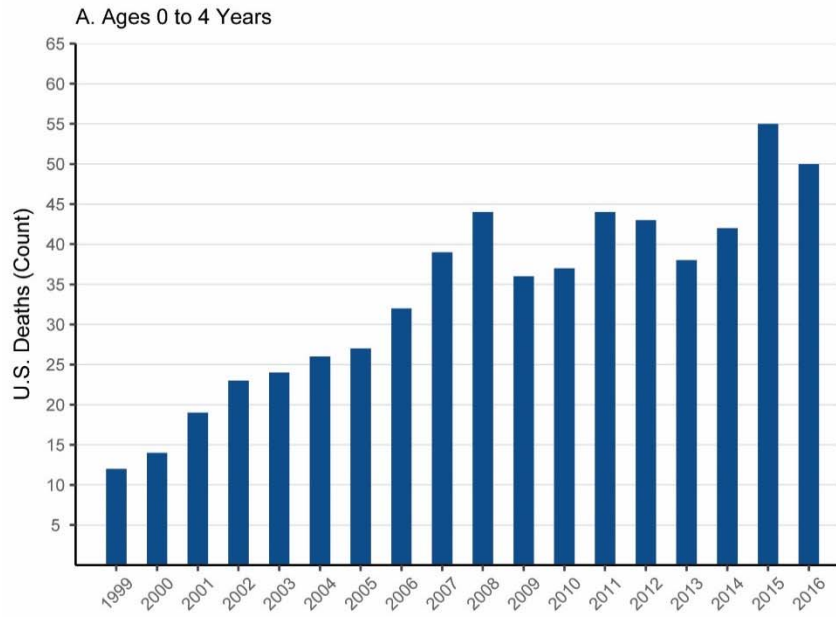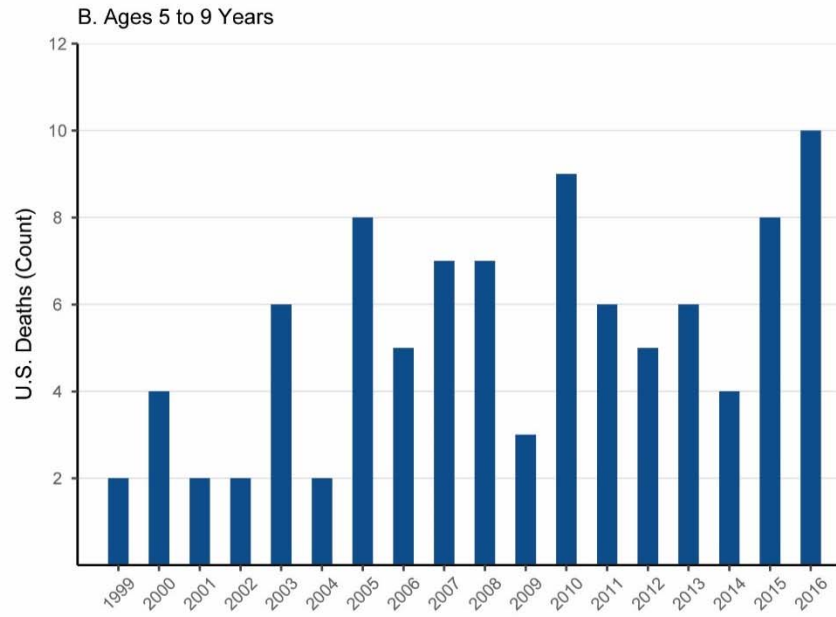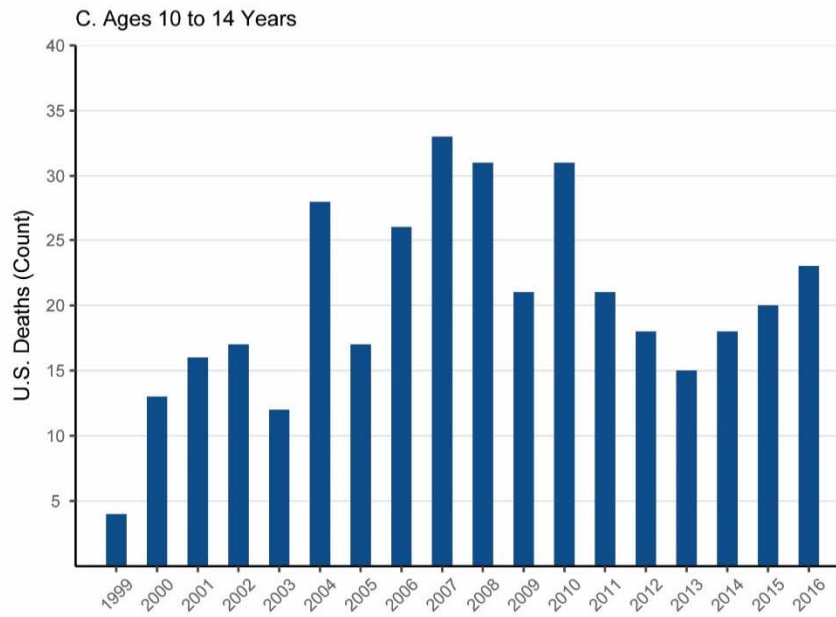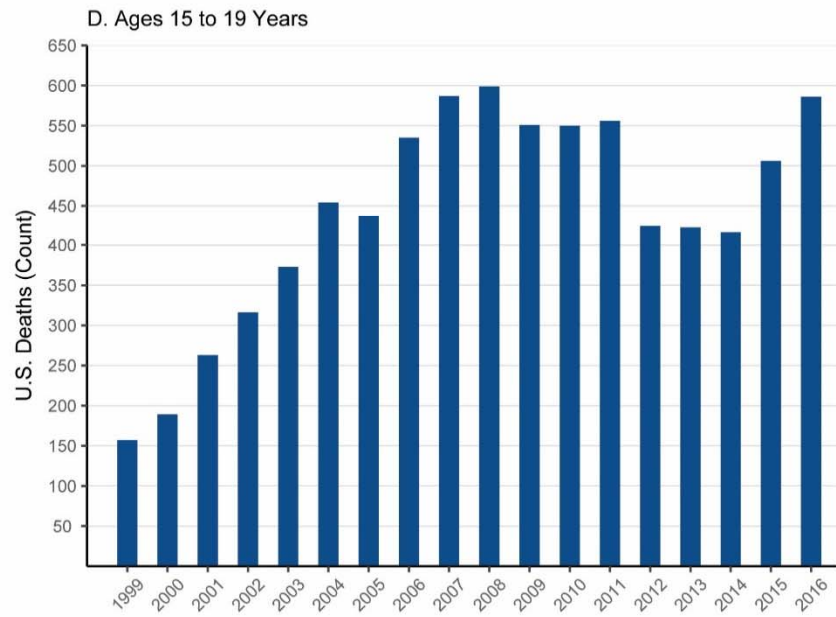

Supplement: jamanetwopen-1-e186558-s001.pdf [file jamanetwopen-1-e186558-s001.pdf]
